# Supplementary material for: Evaluating cost per remission and cost of serious adverse events of advanced therapies for ulcerative colitis
Source: Springer Nature journal article supplement (doi:10.1186/s12876-022-02590-6), 2022-12-06
Supplement: MOESM1 [file 12876_2022_2590_MOESM1_ESM.pdf]

**Supplemental Material for:**

**Evaluating Cost Per Remission and Cost of Serious Adverse Events  
of Advanced Therapies for Ulcerative Colitis**

***BMC Gastroenterology***

Jairath V, et al

**Supplementary Table 1. Dose-Escalation Estimates<sup>1</sup>**

| <b>Advanced Therapy</b>   | <b>% of Patients Who Dose Escalated</b> | <b>% Increase in Drug Utilization</b> | <b>% Total Increase</b> |
|---------------------------|-----------------------------------------|---------------------------------------|-------------------------|
| Tofacitinib 10 mg PO BID  | –                                       | –                                     | –                       |
| Tofacitinib 5 mg PO BID   | –                                       | –                                     | –                       |
| Infliximab 5 mg/kg IV Q8W | 39                                      | 70                                    | 28                      |
| Vedolizumab 300 mg IV Q8W | 23                                      | 62                                    | 14                      |
| Golimumab 100 mg SC Q4W   | 14                                      | 45                                    | 6                       |
| Adalimumab 40 mg SC Q2W   | 28                                      | 59                                    | 16                      |
| Ustekinumab 90 mg SC Q8W  | 22                                      | 131                                   | 28                      |

Proportion of patients who dose escalated and percentage increase in drug utilization represent patients with inflammatory bowel disease. BID, twice daily; IV, intravenous; PO, by mouth; Q2W, every 2 weeks; Q4W, every 4 weeks; Q8W, every 8 weeks; SC, subcutaneous.

**Supplementary Table 2. Costs Per Infusion by Site-of-Care<sup>1</sup>**

|                                           | <b>% of Patients</b> |                   | <b>Cost Per Infusion, US\$</b> |                   |
|-------------------------------------------|----------------------|-------------------|--------------------------------|-------------------|
|                                           | <b>Vedolizumab</b>   | <b>Infliximab</b> | <b>Vedolizumab</b>             | <b>Infliximab</b> |
| Physician's office                        | 51.3                 | 55.7              | 7277                           | 4671              |
| Home infusion                             | 9.0                  | 6.1               | 7171                           | 5080              |
| Outpatient hospital                       | 39.7                 | 38.2              | 12,481                         | 8598              |
| Total weighted cost                       | –                    | –                 | 9335                           | 6197              |
| Increase in cost vs base case analysis, % | –                    | –                 | 25.8                           | 27.9              |

US\$, United States dollars.

## Supplementary Figure 1. Systematic Literature Review Search Terms and PRISMA Diagrams

### Search terms for “dose escalation”:

(IBD OR IBDs "inflammatory bowel disease" OR "ulcerative colitis") AND ("dose escalation" OR "dose-escalation" OR escalation) AND (biologics OR biologic OR "advanced therapy" OR "advanced therapies" OR TIM OR TIMs OR "targeted immunomodulators" OR "targeted immunomodulator")

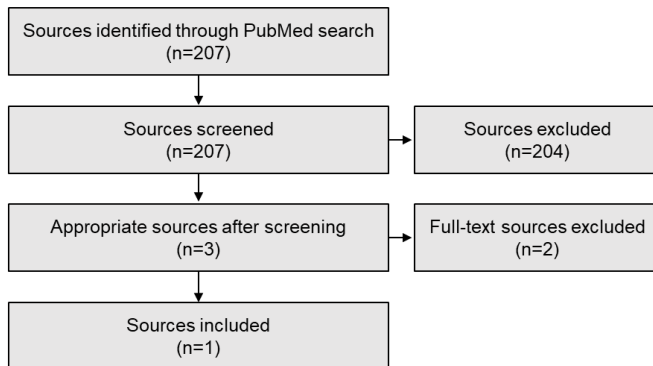

### Search terms for “site-of-care”:

(IBD OR IBDs "inflammatory bowel disease" OR "ulcerative colitis") AND (biologics OR biologic OR "advanced therapy" OR "advanced therapies" OR TIM OR TIMs OR "targeted immunomodulators" OR "targeted immunomodulator") AND ("site of care" OR "site of infusion" OR "infusion site" OR "infusion setting" OR "physician office" OR "home infusion" OR infusion)

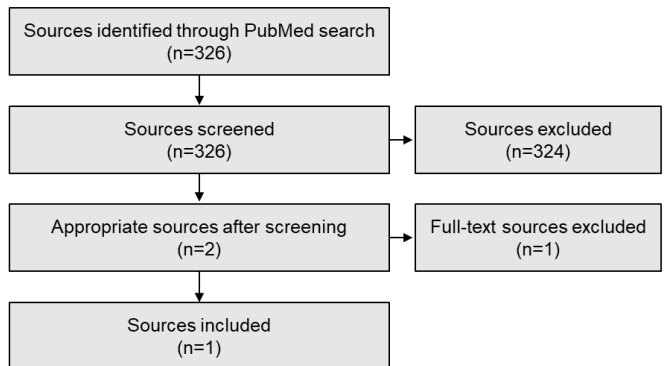

IBD, inflammatory bowel disease; TIM, targeted immunomodulator.

### Search filters: published in the last 10 years, English language

Screening process: Title, abstract, and full text were reviewed by authors. For “dose escalation,” sources were screened for the percentage and magnitude of dose escalation (decrease in interval or increase in dose) in all biologic therapies where dose escalation was prescribed. For “site-of-care,” sources were screened for the percentage of patients who infuse at home, physician offices/infusion centers, or hospitals for intravenous-infused therapies, and the cost differences between these locations. Authors reviewed appropriate sources and collectively decided on 1 source for each of the sensitivity analyses based on the strength of the evidence and appropriateness of the endpoints investigated.

**Supplementary Figure 2.** Cost Per Responder at 52 Weeks Based on a Sensitivity Analysis Incorporating Dose-Escalation Costs for Patients With UC Treated With an Advanced Therapy

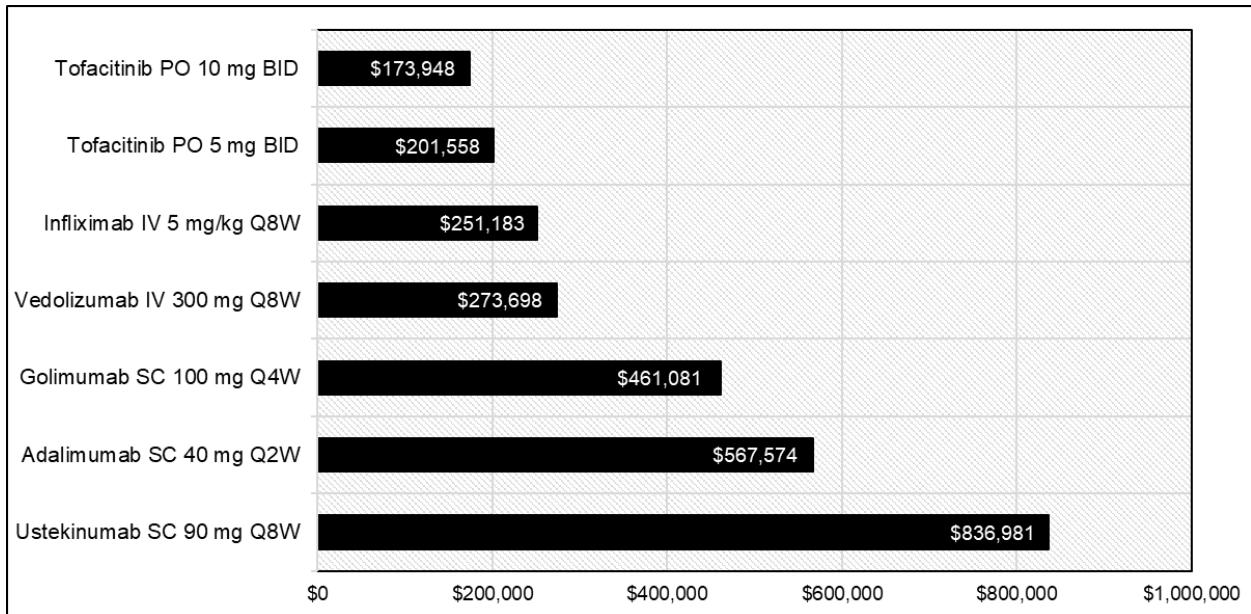

BID, twice daily; IV, intravenous; PO, by mouth; Q2W, every 2 weeks; Q4W, every 4 weeks; Q8W, every 8 weeks; SC, subcutaneous; UC, ulcerative colitis.

**Supplementary Figure 3.** Cost Per Remitter at 52 Weeks Based on a Sensitivity Analysis Incorporating Dose Escalation Costs for Patients With UC Treated With an Advanced Therapy

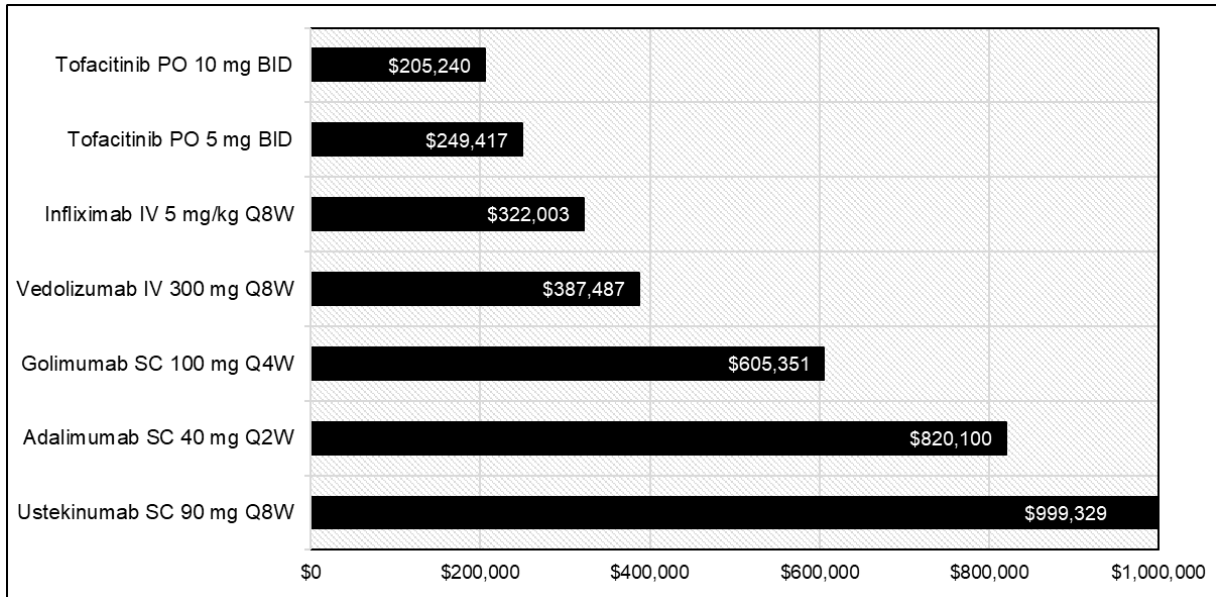

BID, twice daily; IV, intravenous; PO, by mouth; Q2W, every 2 weeks; Q4W, every 4 weeks; Q8W, every 8 weeks; SC, subcutaneous; UC, ulcerative colitis.

**Supplementary Figure 4.** Cost Per Responder at 52 Weeks Based on a Sensitivity Analysis Incorporating Site-of-Care Costs for Patients With UC Treated With an Advanced Therapy

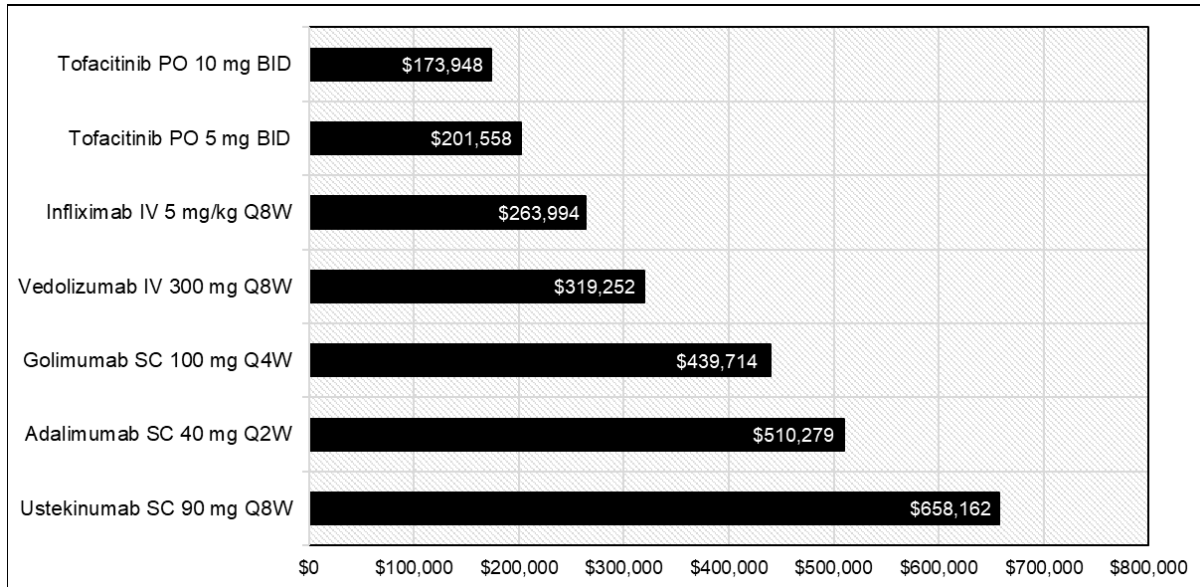

BID, twice daily; IV, intravenous; PO, by mouth; Q2W, every 2 weeks; Q4W, every 4 weeks; Q8W, every 8 weeks; SC, subcutaneous; UC, ulcerative colitis.

**Supplementary Figure 5.** Cost Per Remitter at 52 Weeks Based on a Sensitivity Analysis Incorporating Site-of-Care Costs for Patients With UC Treated With an Advanced Therapy

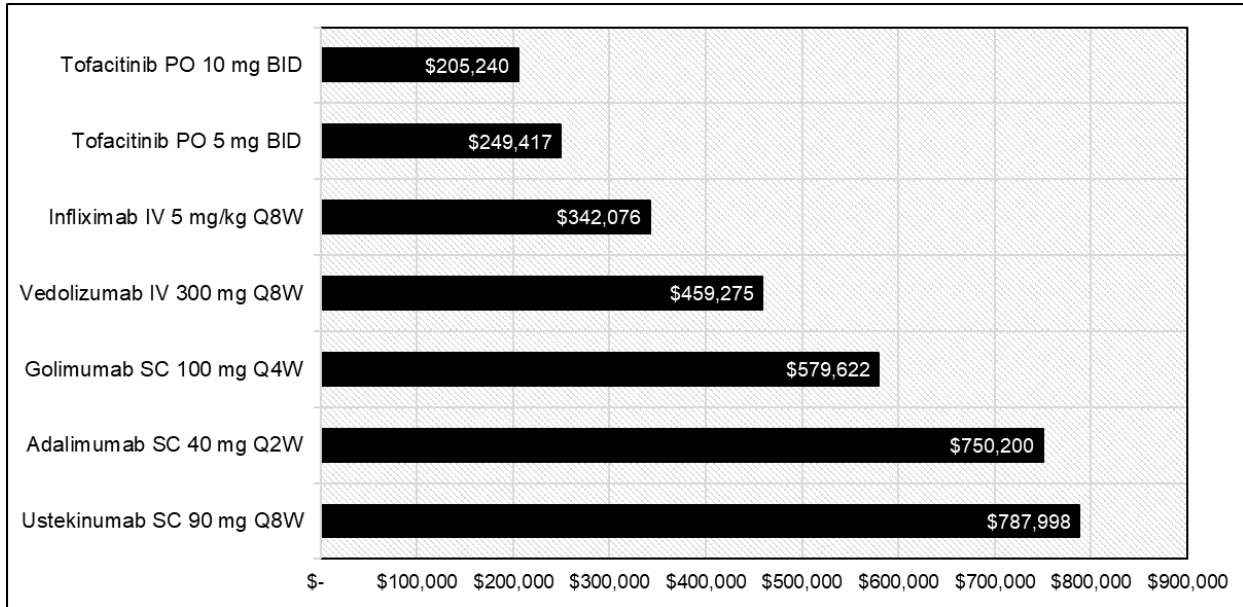

BID, twice daily; IV, intravenous; PO, by mouth; Q2W, every 2 weeks; Q4W, every 4 weeks; Q8W, every 8 weeks; SC, subcutaneous; UC, ulcerative colitis.

**Reference**

Ehrenberg R, Griffith J, Theigs C, McDonald B. Dose escalation assessment among targeted immunomodulators in the management of inflammatory bowel disease. *J Manag Care Spec Pharm.* 2020;26(6):758-765.
